# Supplementary material for: The minimal kinome of Giardia lamblia illuminates early kinase evolution and unique parasite biology
Source: Springer Nature journal article supplement (doi:10.1186/gb-2011-12-7-r66), 2011-07-01

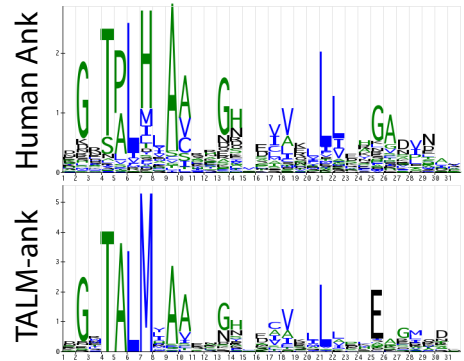

Supplement: 13059_2010_2571_MOESM9_ESM.PDF [file 13059_2010_2571_MOESM9_ESM.PDF]
